# Supplementary material for: Novel autophagy inducers lentztrehaloses A, B and C
Source: PubMed Central journal article supplement — J Antibiot (Tokyo). 2015 Mar 11;68(8):521–9. doi: 10.1038/ja.2015.23 (PMC4579591; doi:10.1038/ja.2015.23), 2015-03-11
Supplement: ja201523x1.pdf [file ja201523x1.pdf]

Supplementary Figure 1

$^1\text{H}$  NMR spectrum of lentztrehalose B in  $\text{CD}_3\text{OD}$

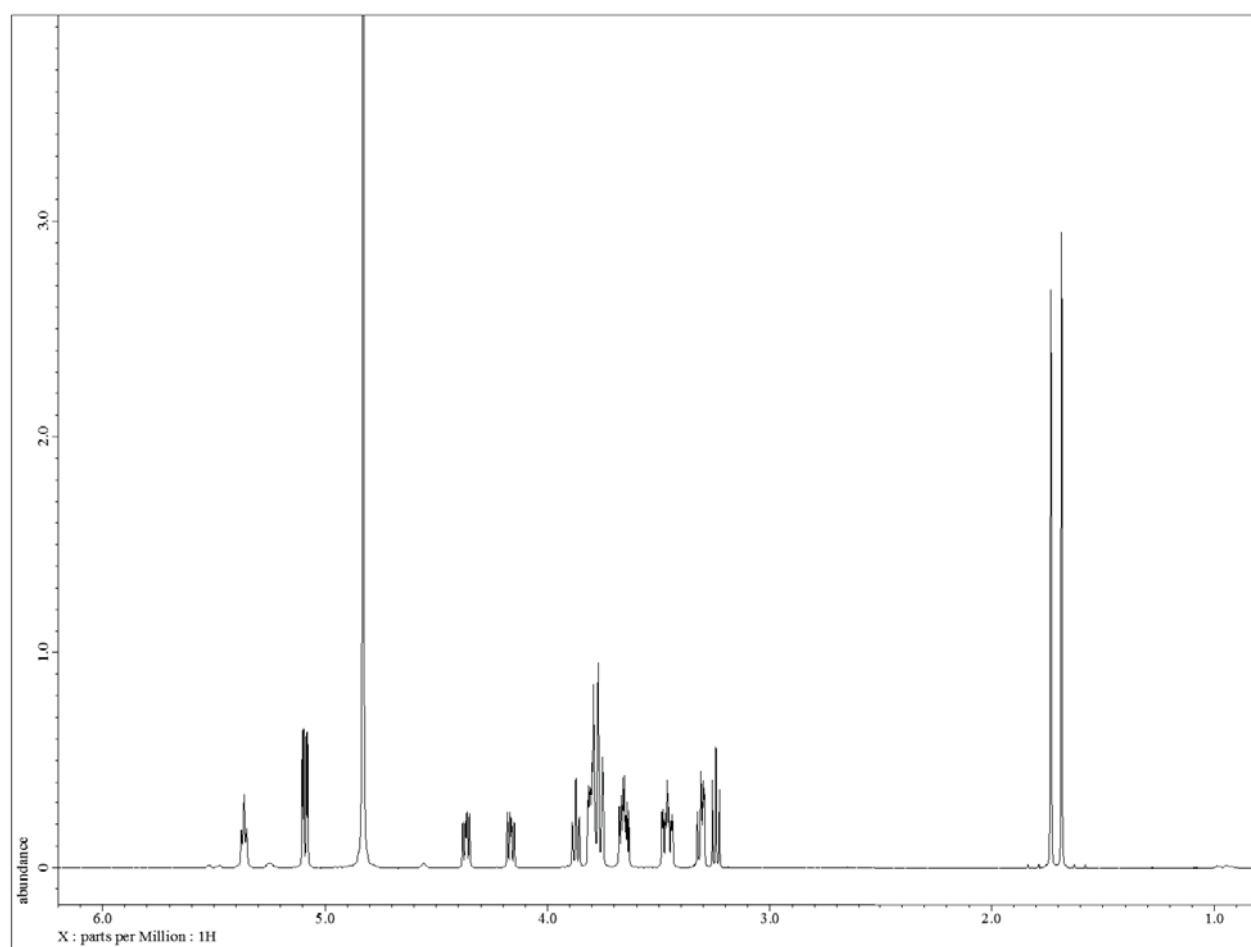

Supplementary Figure 2

$^{13}\text{C}$  NMR spectrum of lentztrehalose B in  $\text{CD}_3\text{OD}$

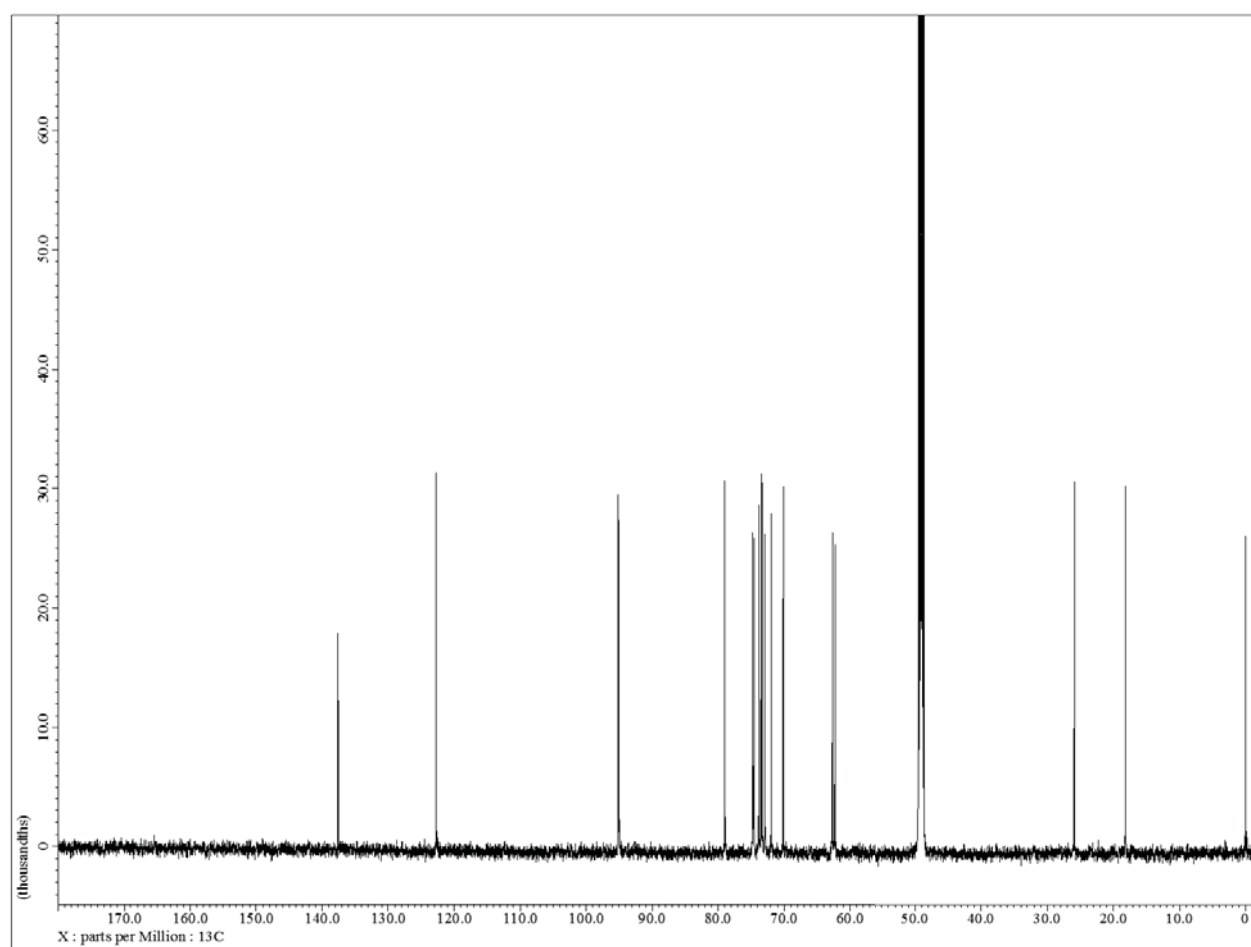

DEPT135 spectrum of lentztrehalose B in CD<sub>3</sub>OD

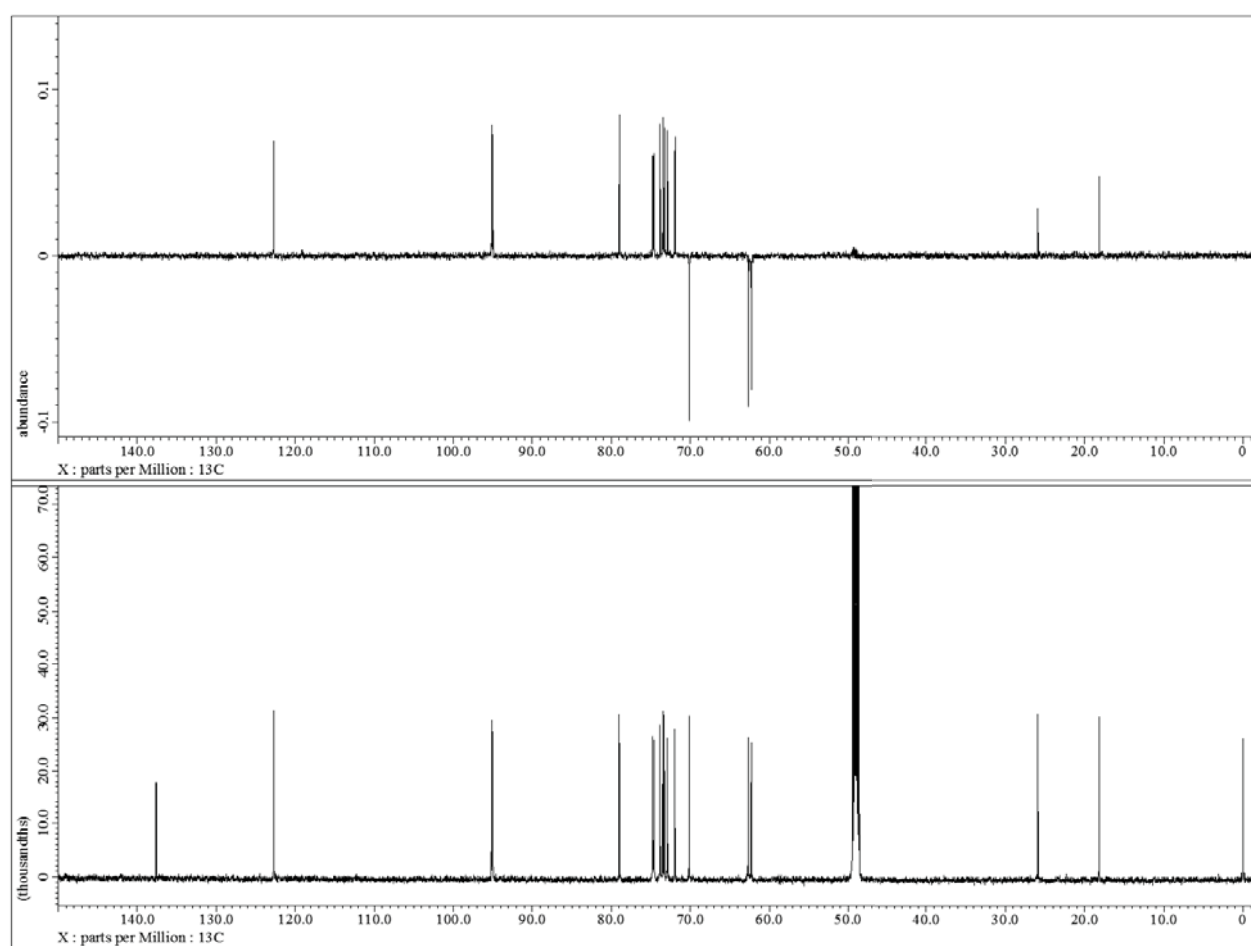

$^1\text{H}$  COSY spectrum of lentztrehalose B in  $\text{CD}_3\text{OD}$

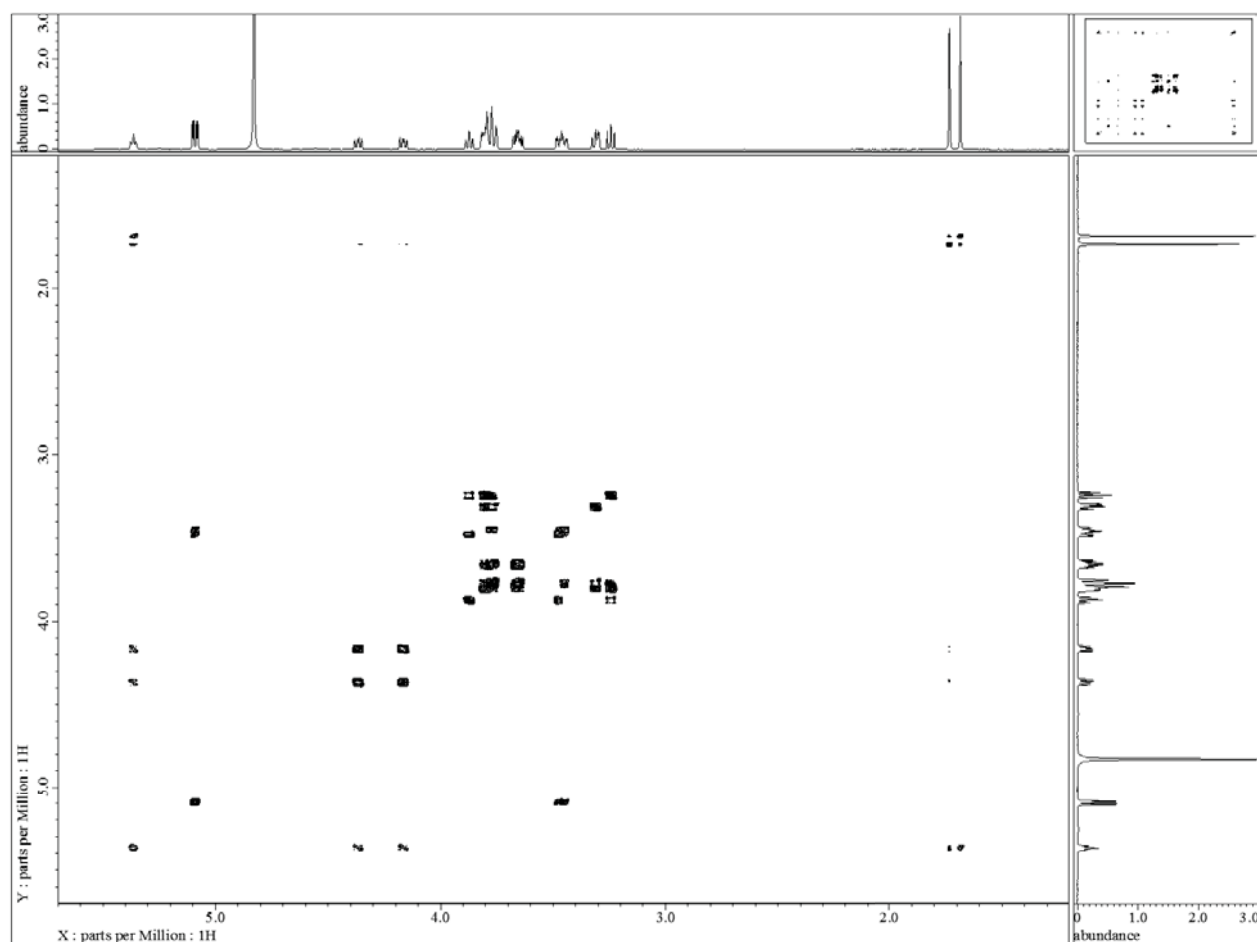

Supplementary Figure 5

$^1\text{H}$ - $^{13}\text{C}$  HMQC spectrum of lentztrehalose B in  $\text{CD}_3\text{OD}$

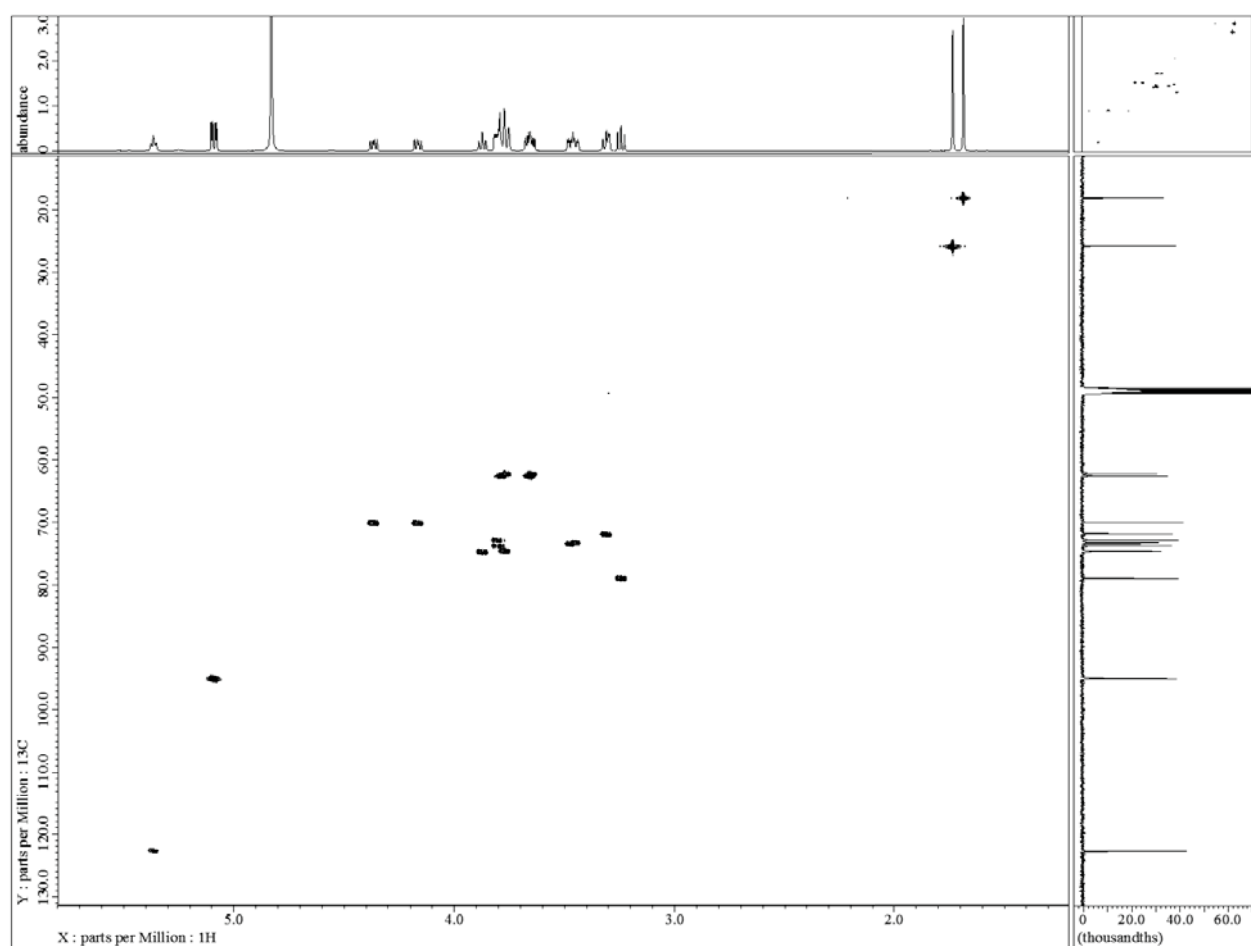

$^1\text{H}$ -  $^{13}\text{C}$  HMBC spectrum of lentztrehalose B in  $\text{CD}_3\text{OD}$

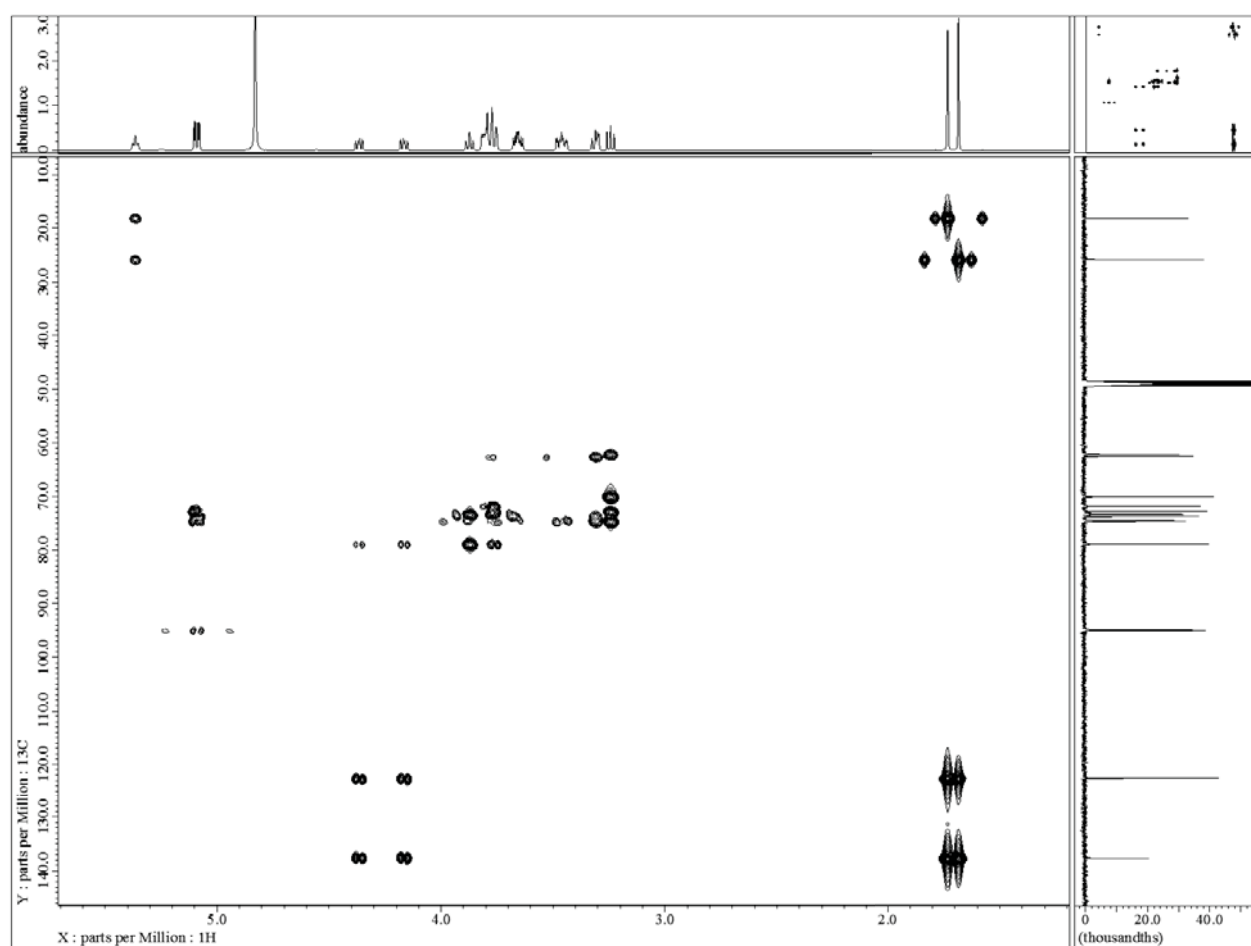

1D TOCSY spectra of lentztrehalose B in CD<sub>3</sub>OD

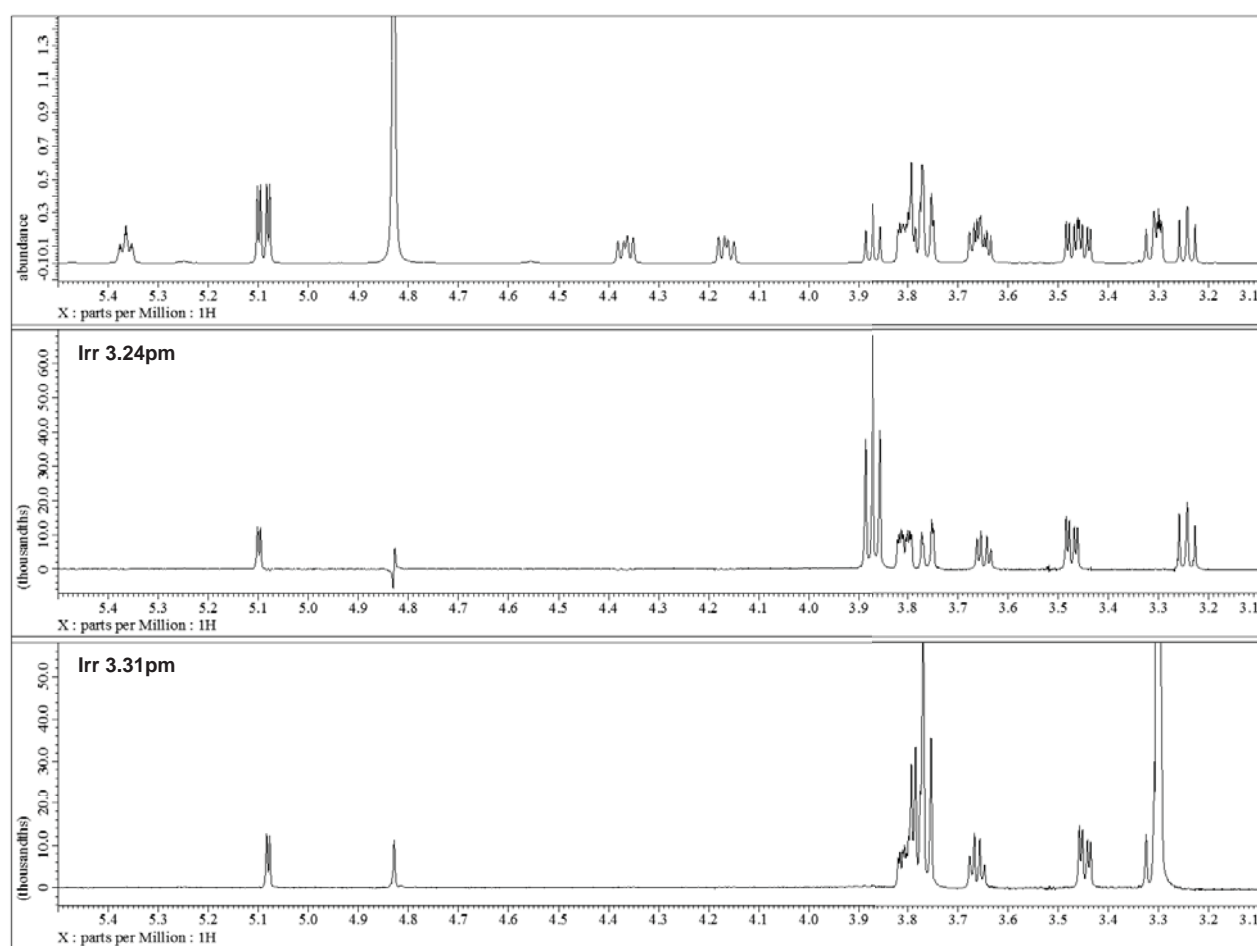

Supplementary Figure 8

1D NOE spectra of lentztrehalose B in CD<sub>3</sub>OD (I)

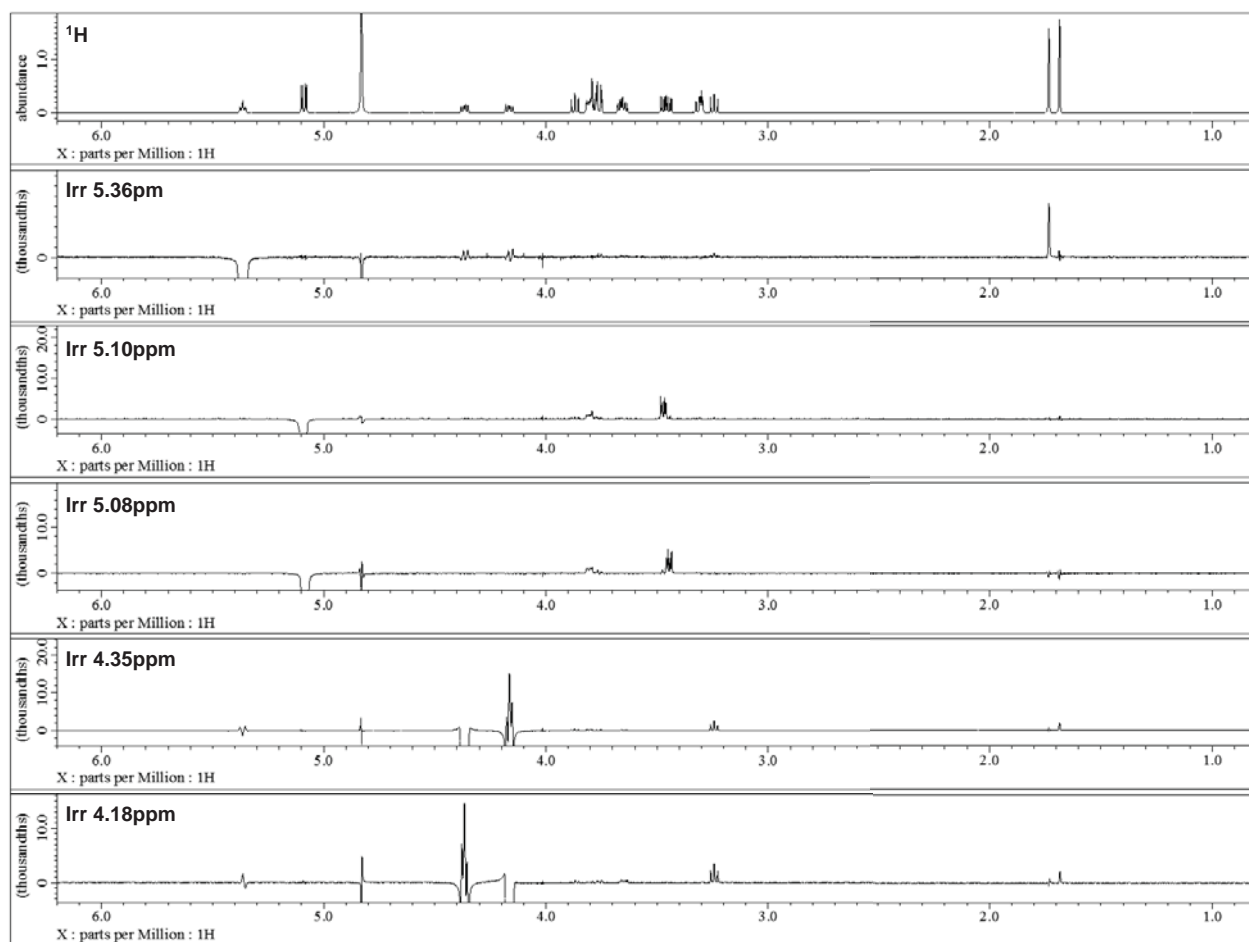



1D NOE spectra of lentztrehalose B in CD<sub>3</sub>OD (II)

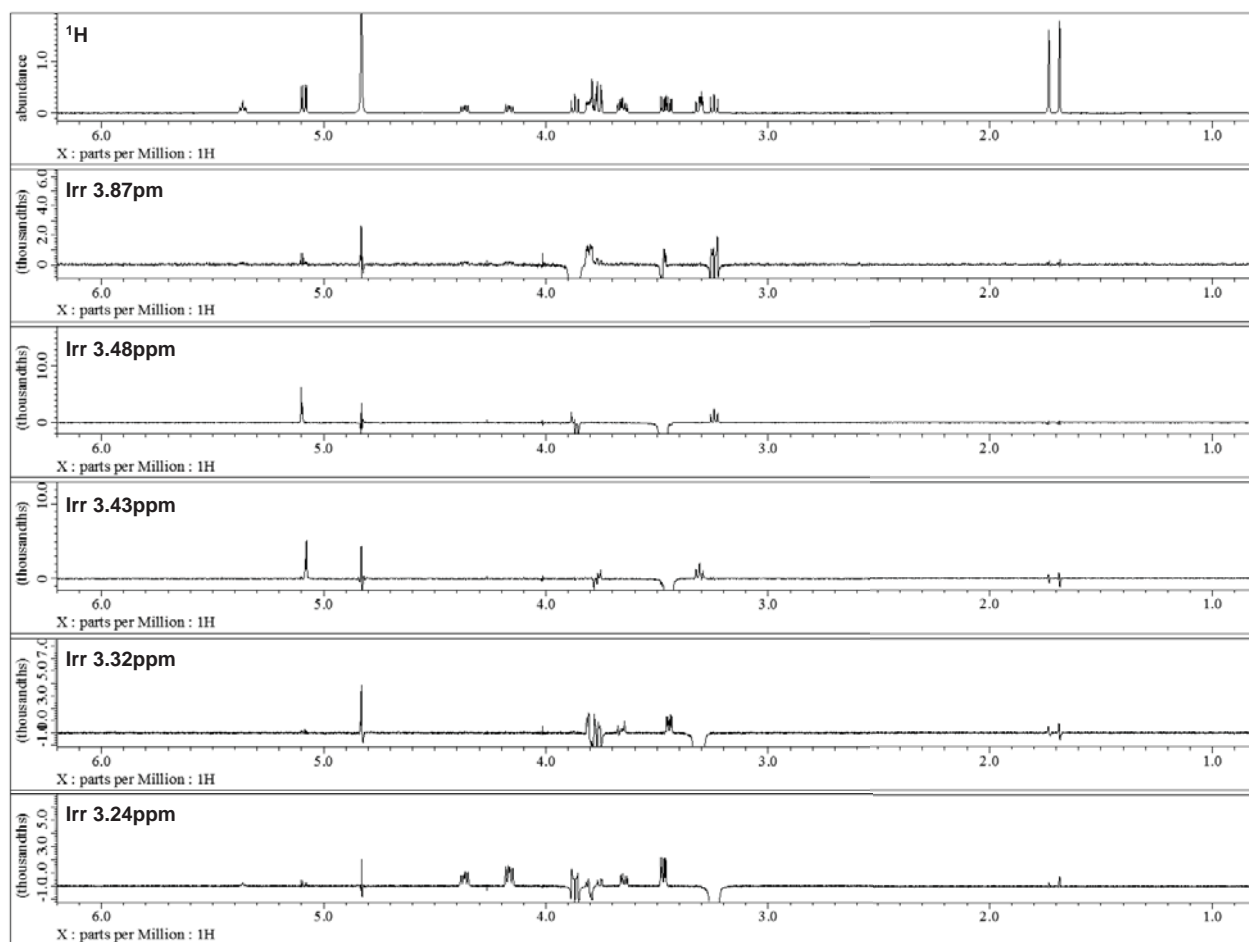

$^1\text{H}$  NMR spectrum of lentztrehalose C in  $\text{CD}_3\text{OD}$

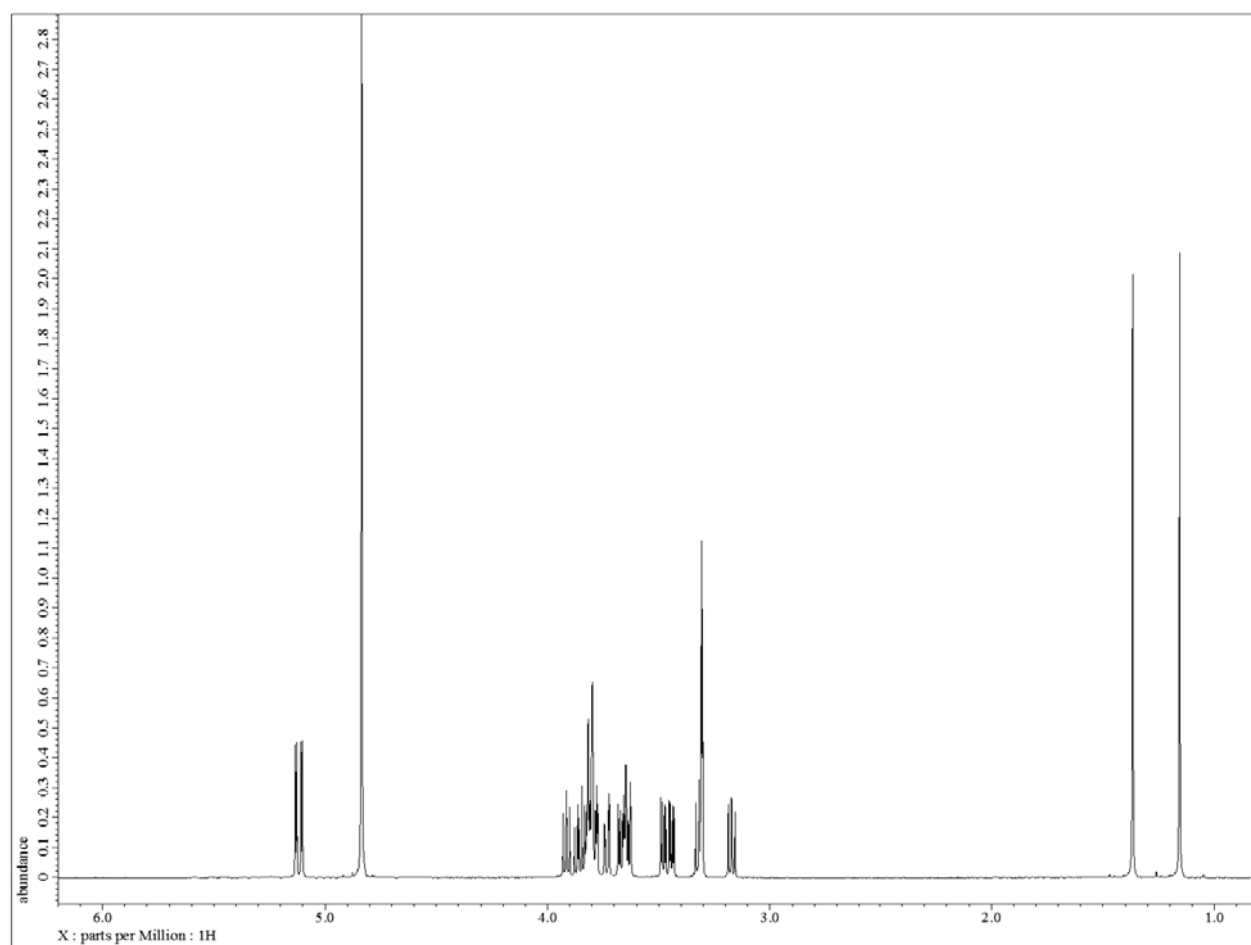

$^{13}\text{C}$  NMR spectrum of lentztrehalose C in  $\text{CD}_3\text{OD}$

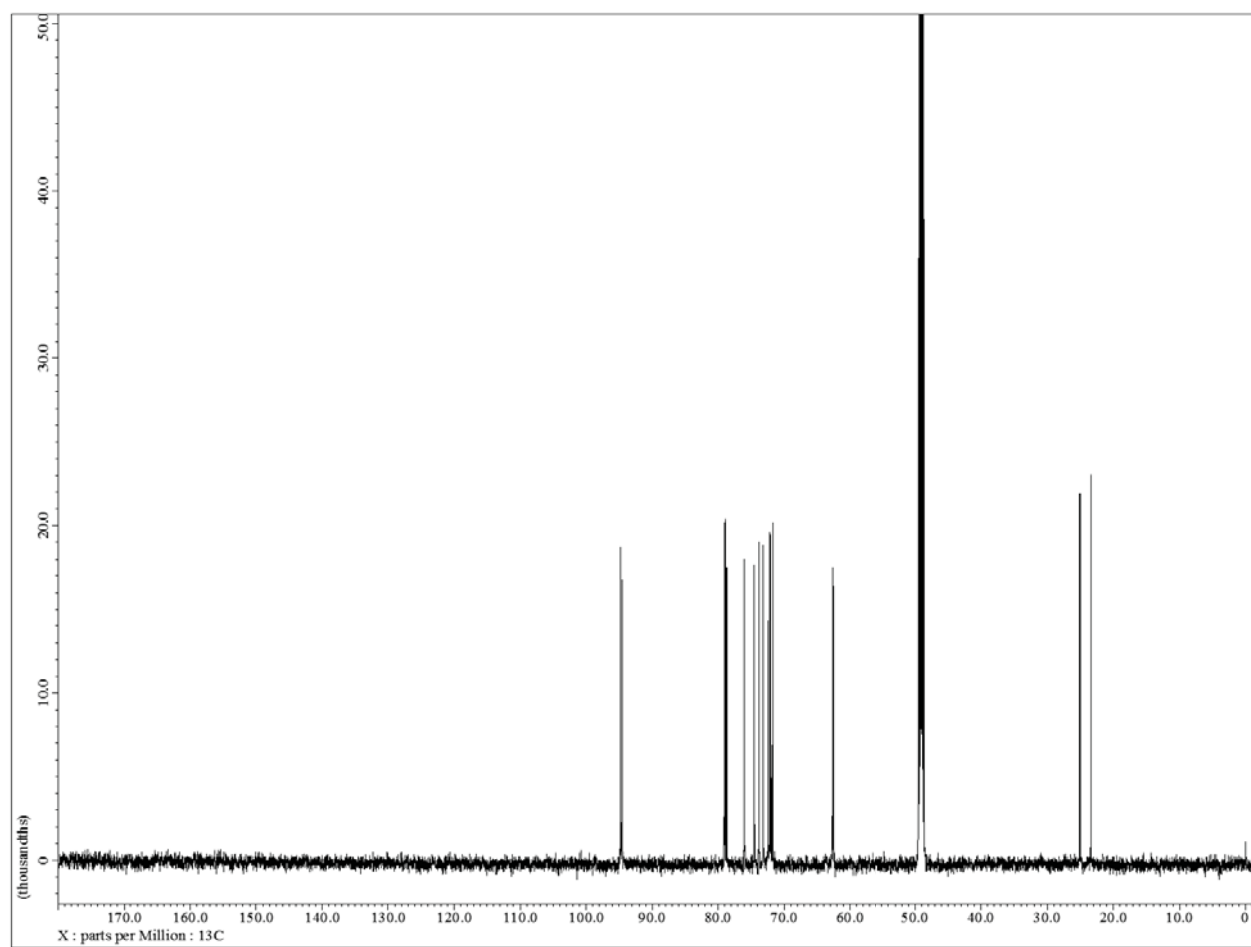

DEPT135 spectrum of lentztrehalose C in CD<sub>3</sub>OD

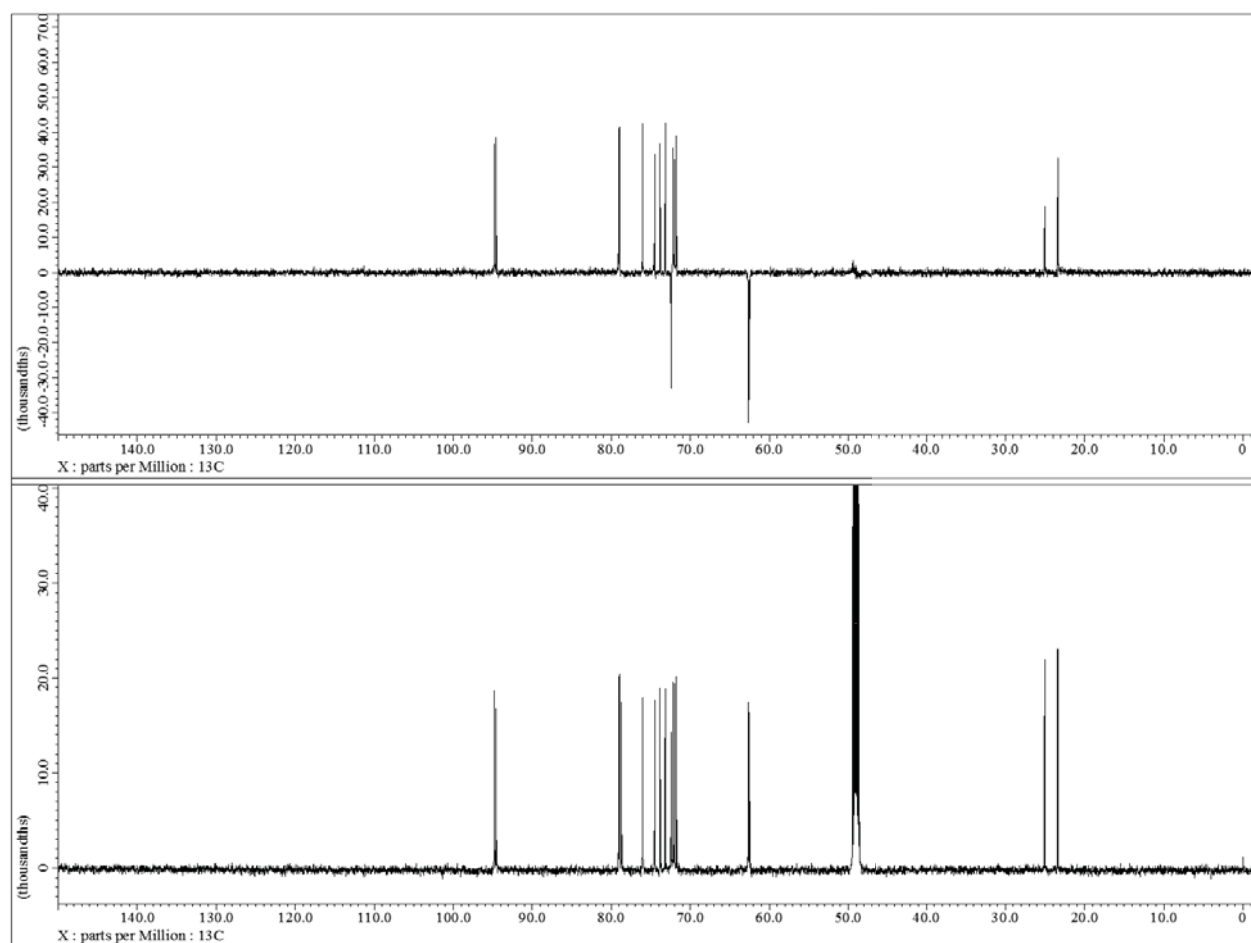

$^1\text{H}$  COSY spectrum of lentztrehalose C in  $\text{CD}_3\text{OD}$

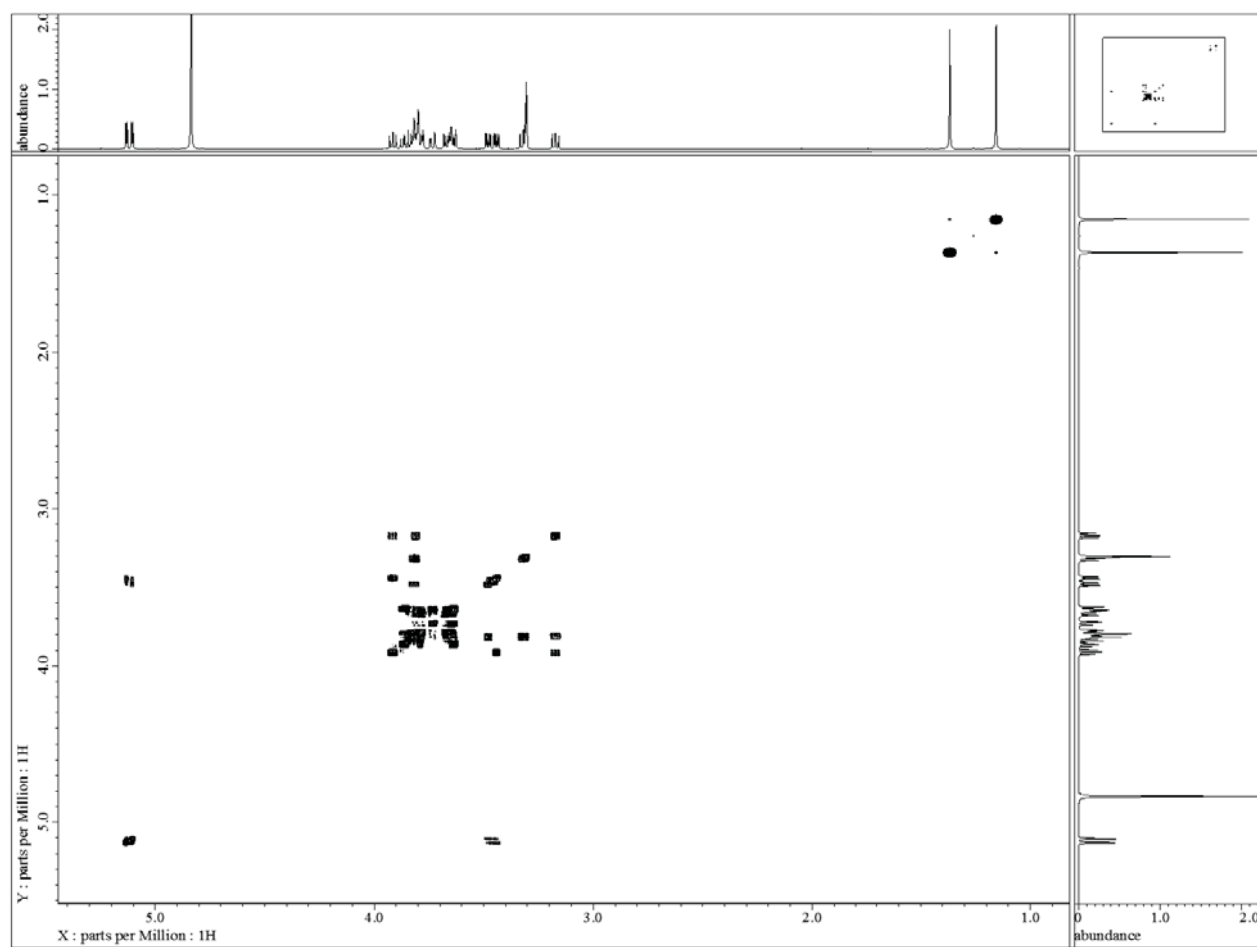

$^1\text{H}$ -  $^{13}\text{C}$  HMQC spectrum of lentztrehalose C in  $\text{CD}_3\text{OD}$

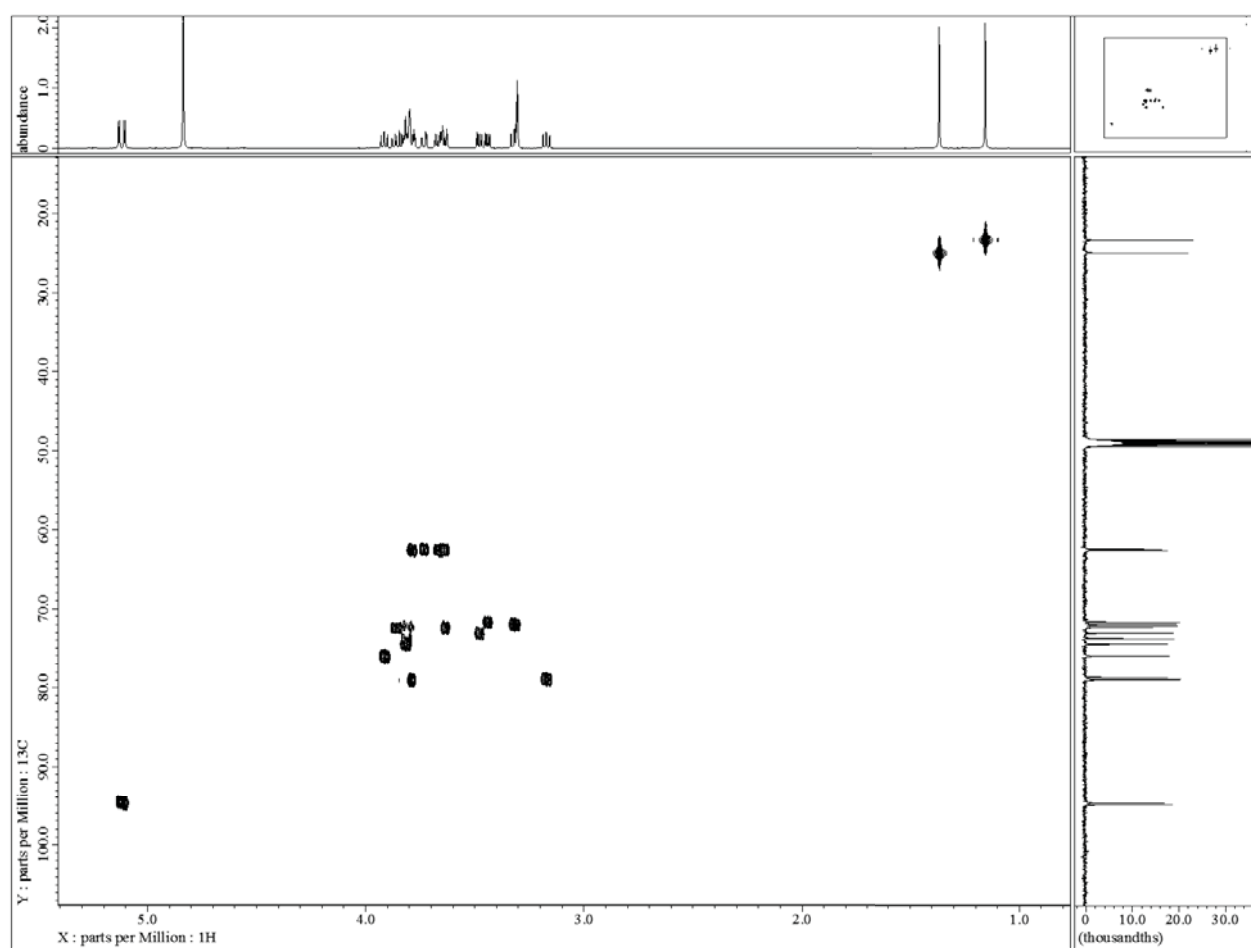

$^1\text{H}$ - $^{13}\text{C}$  HMBC spectrum of lentztrehalose C in  $\text{CD}_3\text{OD}$ 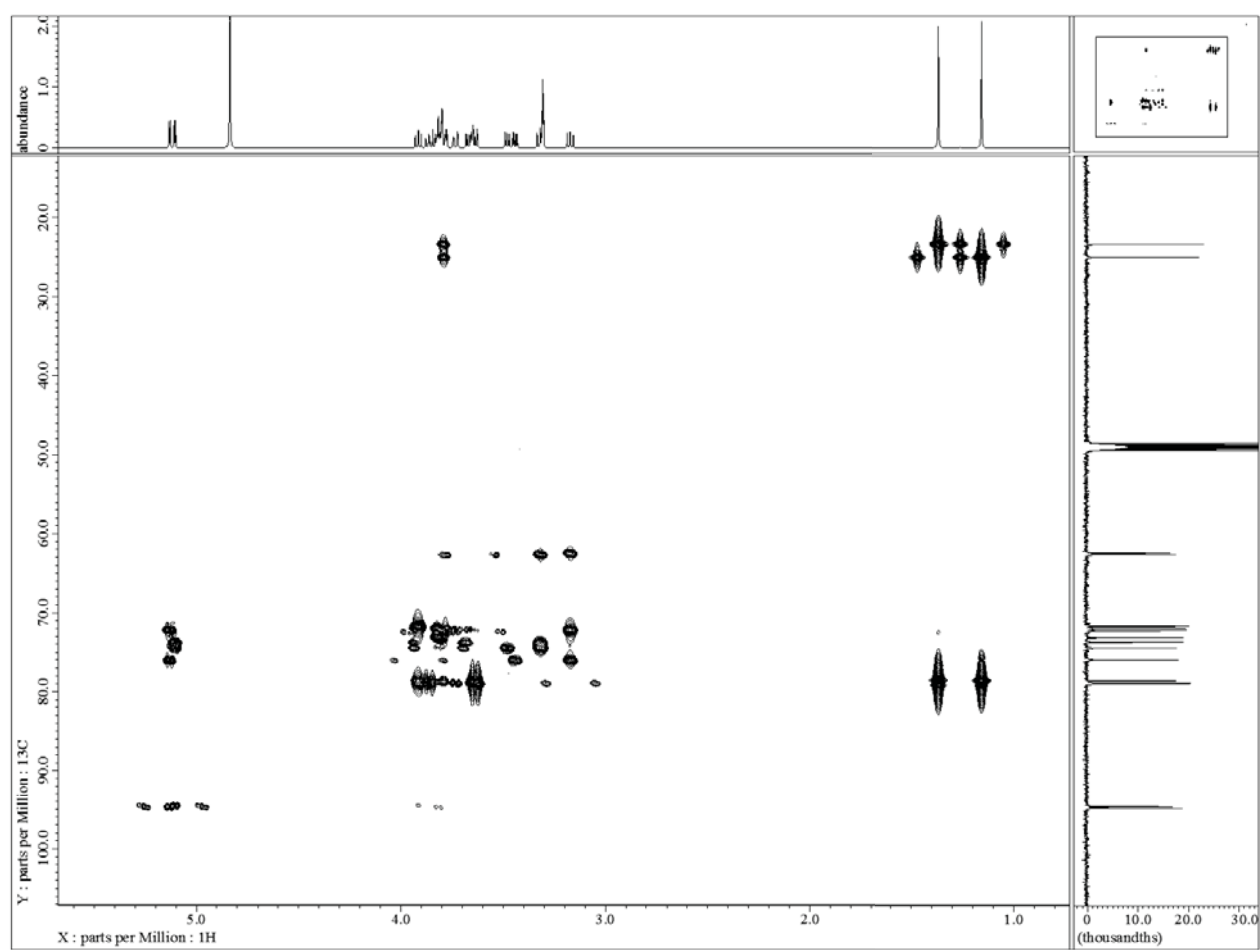

1D TOCSY spectra of lentztrehalose C in CD<sub>3</sub>OD (I)

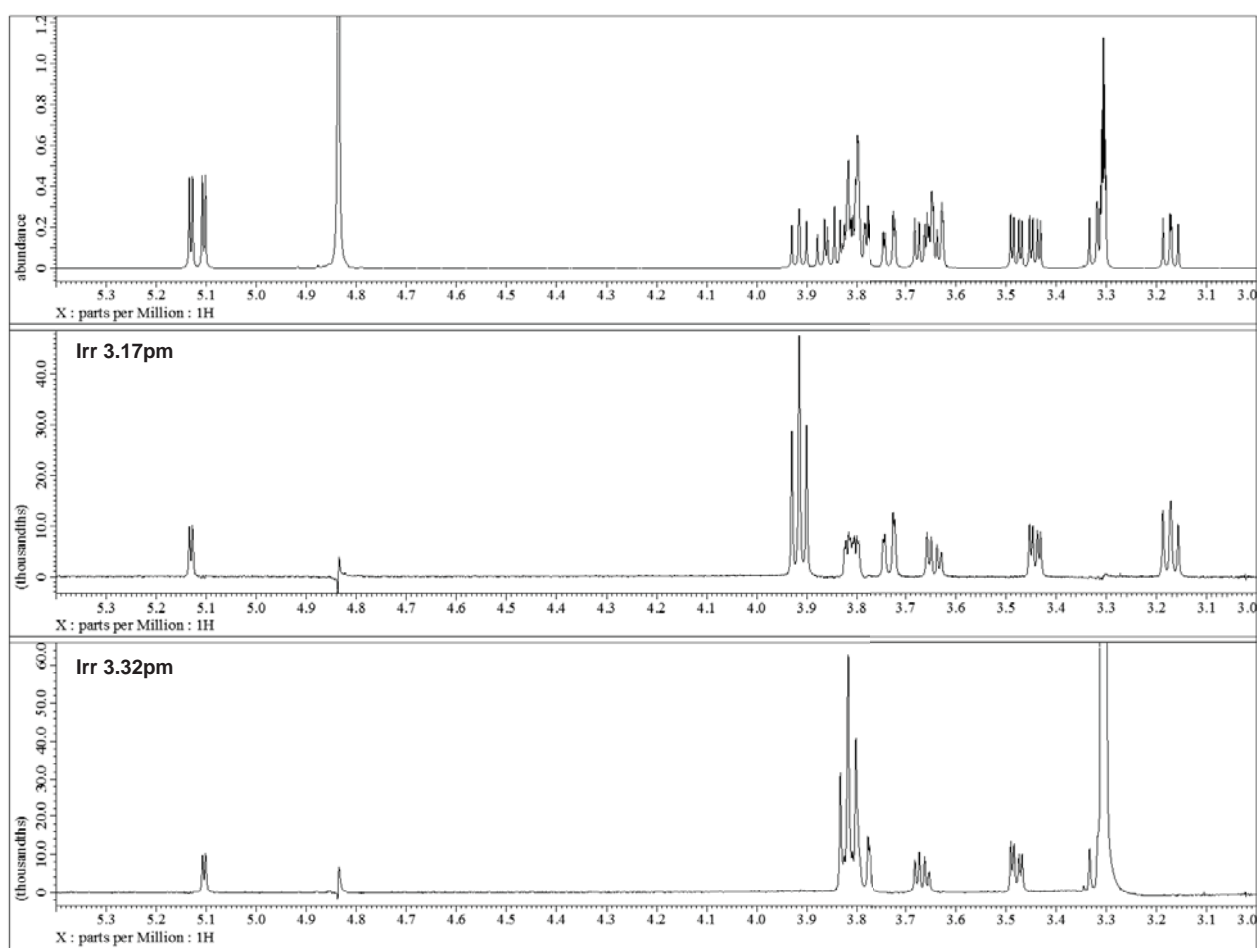



1D TOCSY spectra of lentztrehalose C in CD<sub>3</sub>OD (II)

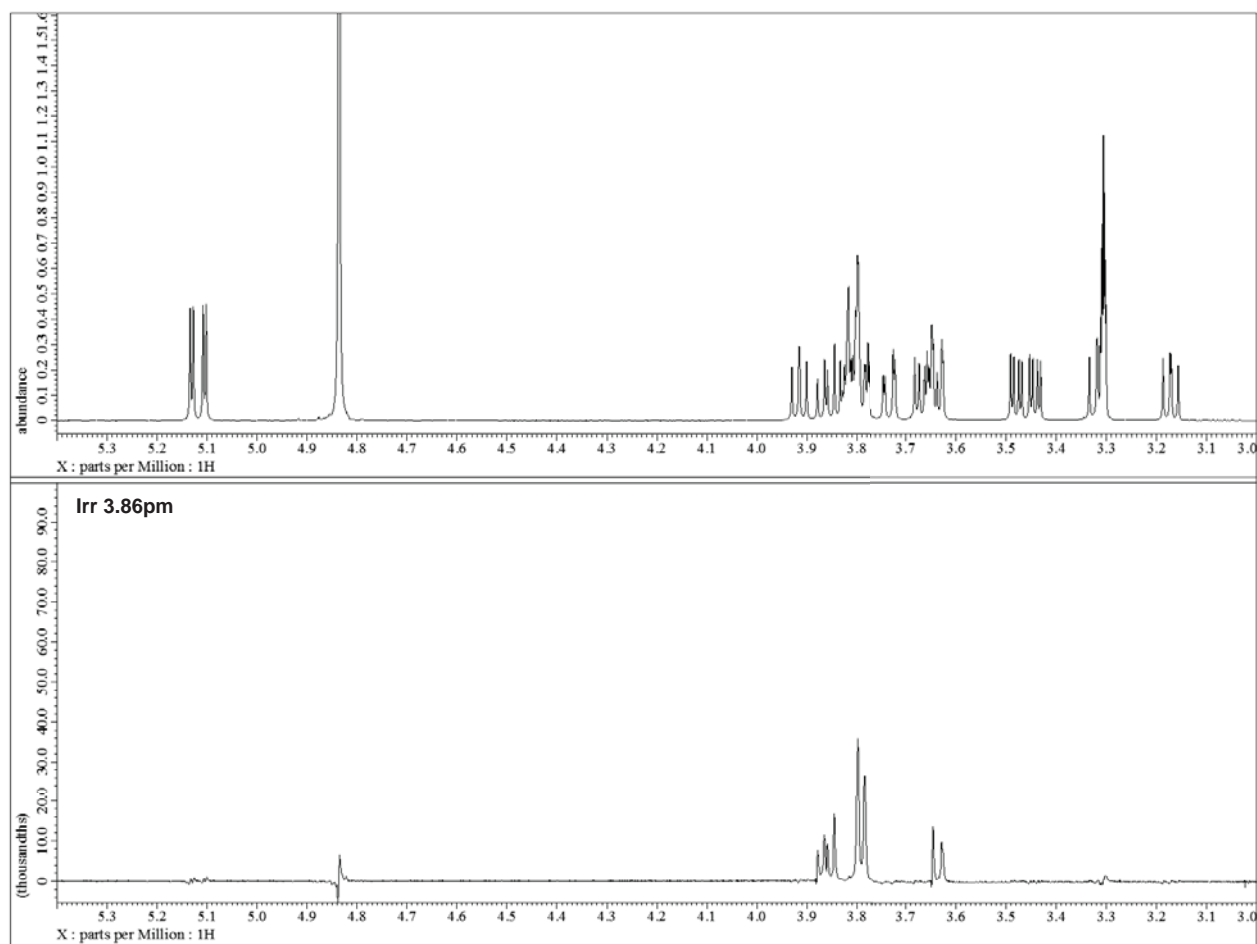

1D NOE spectra of lentztrehalose C in CD<sub>3</sub>OD (I)

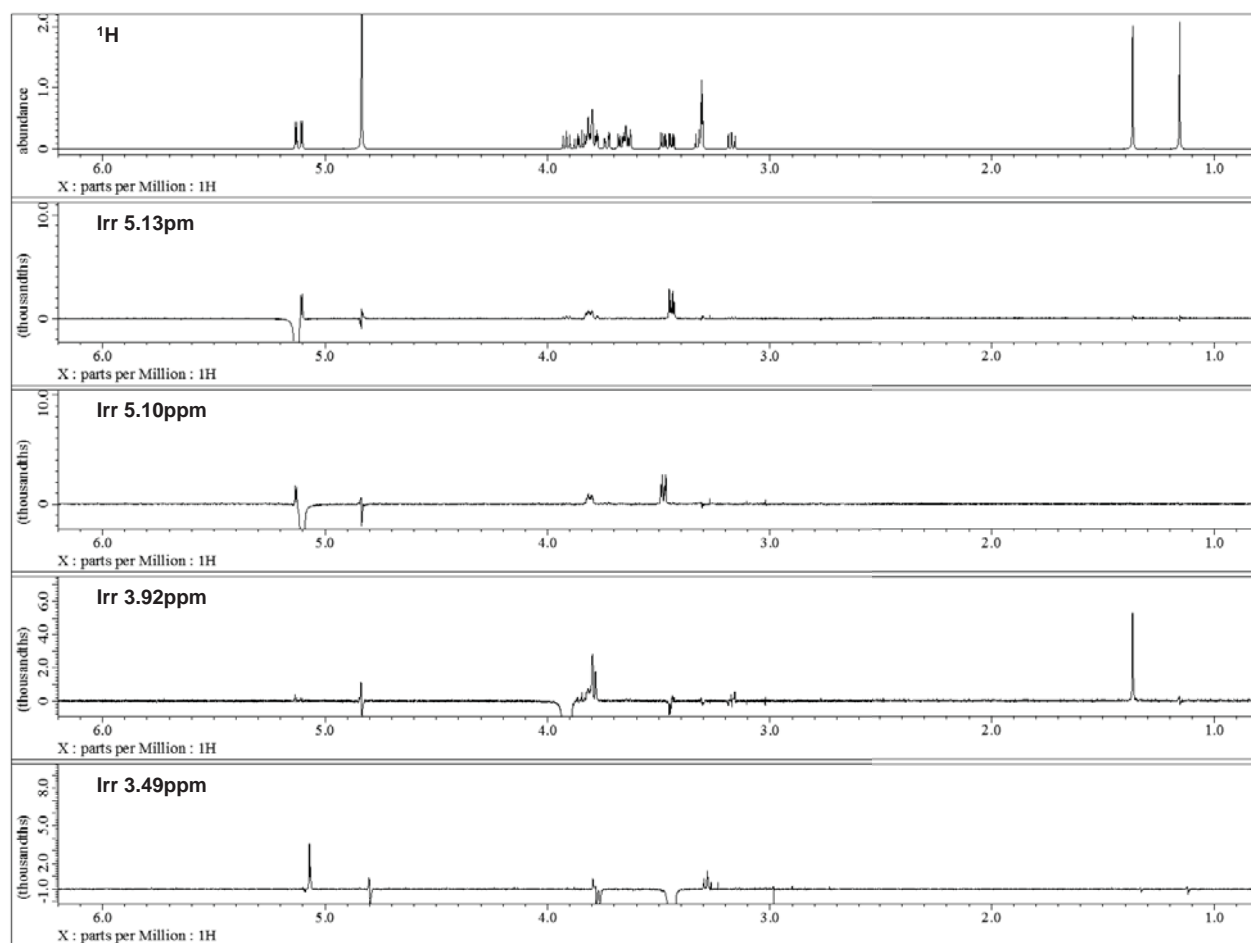

1D NOE spectra of lentztrehalose C in CD<sub>3</sub>OD (II)

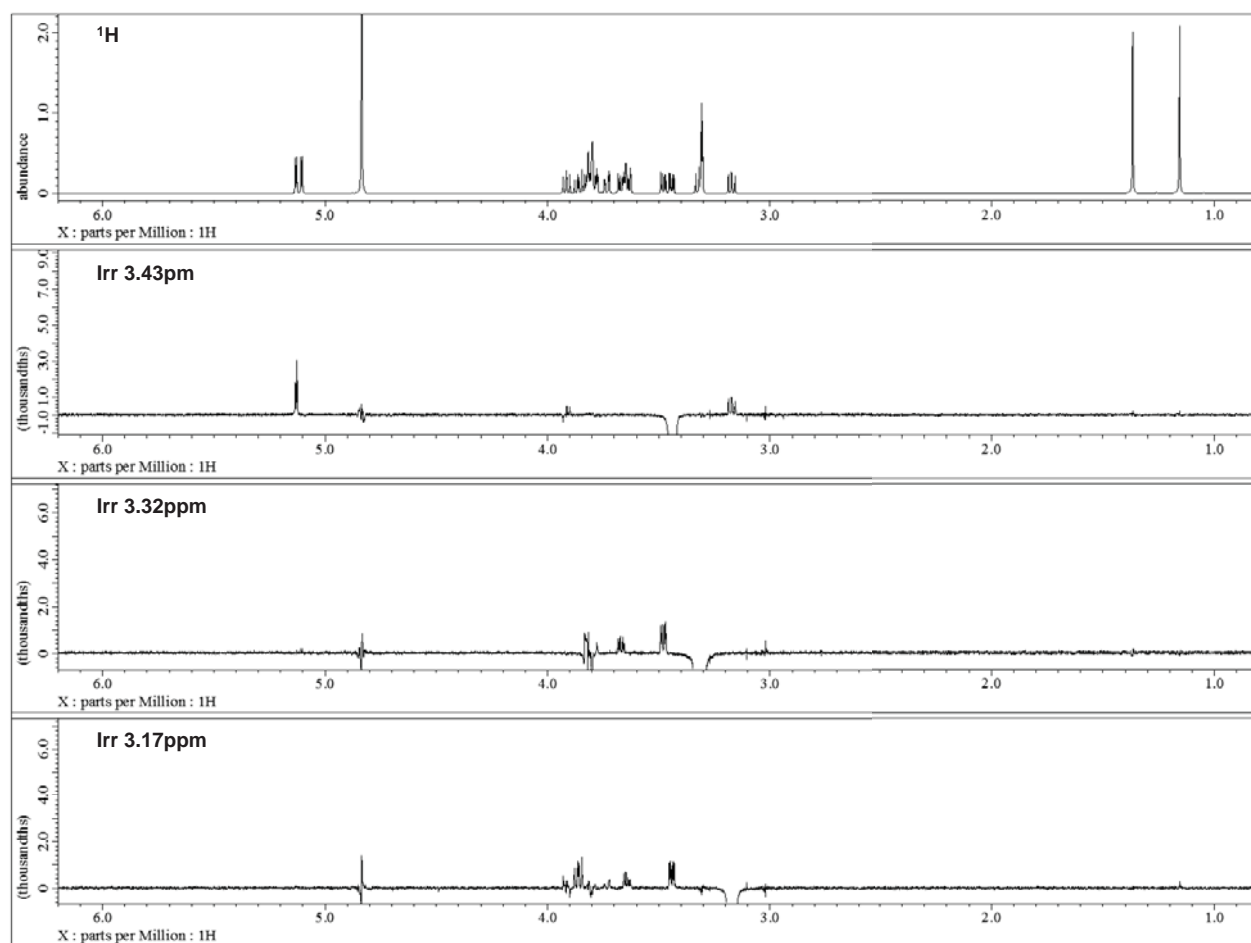

Supplementary Figure 20

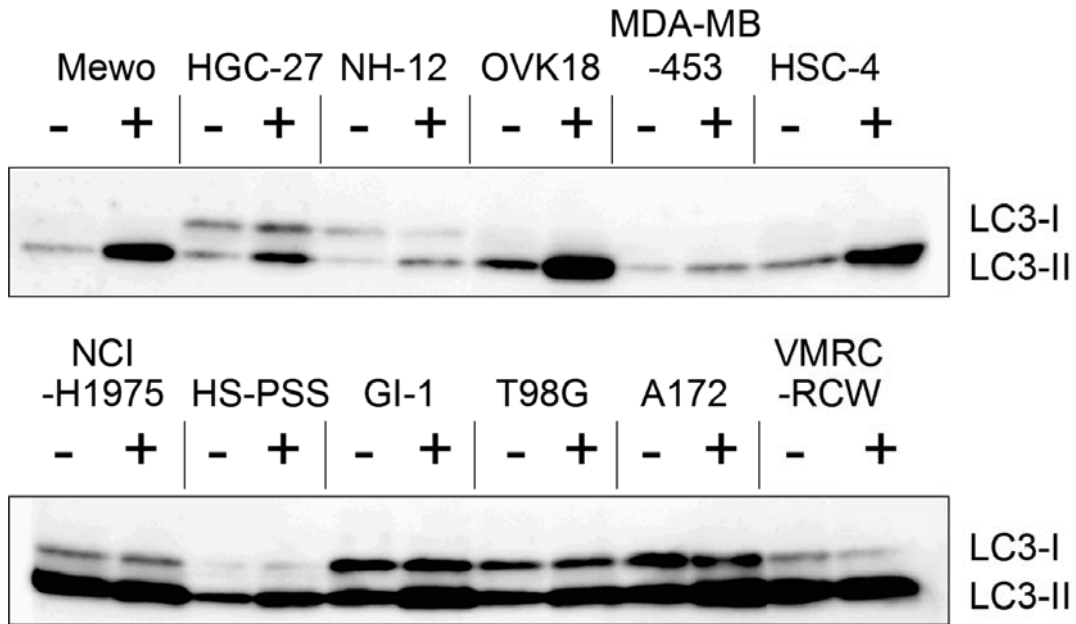

Supplementary Figure 20. Induction of autophagy by trehalose in human cancer cells.

Each cancer cell line was plated at  $2.7 \times 10^4$  cells/ml on a culture dish and cultured for 72 hours.

The cells were treated with (+) or without (-) 100-mM trehalose for 24 hours and 2.5- $\mu$ g protein of whole cell lysates was applied on western blotting to detect the expression levels of autophagy markers LC3-I and LC3-II.

Cancer cell lines: Mewo (melanoma) was obtained from Health Science Research Resources Bank (Sennan, Japan). HGC-27 (gastric cancer), NH-12 (neuroblastoma), OVK18 (ovarian cancer), MDA-MB-453 (breast carcinoma), HSC-4 (tongue squamous cell carcinoma), HS-PSS (peripheral nerve sheath tumor), GI-1 (glioma), T98G (glioblastoma), A172 (glioblastoma), and VMRC-RCW (renal cell carcinoma) were obtained from RIKEN BRC Cell Bank (Tsukuba, Japan). NCI-H1975 (lung cancer) was obtained from American Type Culture Collection (Manassas, VA, USA).
